# Supplementary material for: Network-Based Analysis of Nutraceuticals in Human Hepatocellular Carcinomas Reveals Mechanisms of Chemopreventive Action
Source: PubMed Central journal article supplement — CPT Pharmacometrics Syst Pharmacol. 2015 Jun 1;4(6):350–61. doi: 10.1002/psp4.40 (PMC4505829; doi:10.1002/psp4.40), 2015-06-01
Supplement: psp40004-0350-sd4.pdf [file psp40004-0350-sd4.pdf]

**Supplementary Table S3.** Catalogue numbers of all antibody pairs used for the development of the custom Luminex assays\*

| PROTEIN NAME                       | REFERENCE                 | PROTEIN NAME | REFERENCE         |
|------------------------------------|---------------------------|--------------|-------------------|
| RSK1                               | RnD: DYC892               | BTC          | PAO: CH-BTC-A02   |
| HSPB1                              | PAO: P-HSPB1-A01          | CCL20        | RnD: DY360        |
| CREB1                              | PAO: P-CREB1-A01          | CCL26        | PAO: CH-CCL26-A02 |
| AKT1                               | PAO: P-AKT1-A01           | CSF2         | PAO: CH-CSF2-A02  |
| P38MAPK                            | PAO: P-MK1234-A01         | CTGF         | PAO: CH-CTGF-A02  |
| TOR                                | PAO: P-MTOR-A01           | CXCL10       | PAO: CH-CXL10-A02 |
| GSK3B                              | RnD: DYC1590              | CXCL11       | PAO: CH-CXL11-A02 |
| MEK1                               | PAO: P-MP2K1-A01          | CXCL16       | PAO: CH-CXL16-A02 |
| ERK1                               | PAO: P-MK03-A01           | CXCL7        | PAO: CH-CXCL7-A02 |
| SHP2                               | RnD: DYC3790              | GROA         | PAO: CH-GROA-A02  |
| JNK2                               | RnD: DYC2236              | HAVR1        | RnD: DY1750       |
| MP2K6                              | RnD: DYC5586              | IFNG         | PAO: CH-IFNG-A02  |
| RPS6                               | RnD: DYC3918              | IL13         | PAO: CH-IL13-A02  |
| P70S6K                             | RnD: DYC8965, DYC896      | IL17A        | PAO: CH-IL17A-A02 |
| NFKB                               | PAO: P-NFKB-A01           | IL17F        | PAO: CH-IL17F-A02 |
|                                    |                           | IL1A         | PAO: CH-IL1A-A02  |
|                                    |                           | IL1B         | RnD: DY201        |
|                                    |                           | IL3          | PAO: CH-IL3-A02   |
|                                    |                           | IL4          | PAO: CH-IL4-A02   |
|                                    |                           | IL8          | PAO: CH-IL8-A02   |
|                                    |                           | MIA2         | PAO: CH-MIA2-A02  |
|                                    |                           | NGAL         | PAO: CH-NGAL-A02  |
|                                    |                           | PDGFB        | PAO: CH-PDGFB-A02 |
|                                    |                           | PLGF         | PAO: CH-PLGF-A02  |
|                                    |                           | SCF          | PAO: CH-SCF-A02   |
|                                    |                           | THPO         | PAO: CH-THPO-A02  |
|                                    |                           | TNFA         | PAO: CH-TNFA-A02  |
|                                    |                           | TNR11        | PAO: CH-TNR11-A02 |
| Coupling Kit                       | Luminex: Cat#40-50016     |              |                   |
| Phosphoprotein preparation buffers | ProtATonce: Cat#PPK40-A01 |              |                   |
| Cytokine preparation assay buffers | ProtATonce: Cat#CTP40-A01 |              |                   |
| Multiplex measurement service      | ProtATonce: Custom order  |              |                   |

\*RnD: RnD Systems, <http://www.rndsystems.com>  
 PAO: ProtATonce Ltd, <http://www.protATonce.com>
