# Supplementary material for: Network-Based Analysis of Nutraceuticals in Human Hepatocellular Carcinomas Reveals Mechanisms of Chemopreventive Action
Source: PubMed Central journal article supplement — CPT Pharmacometrics Syst Pharmacol. 2015 Jun 1;4(6):350–61. doi: 10.1002/psp4.40 (PMC4505829; doi:10.1002/psp4.40), 2015-06-01
Supplement: psp40004-0350-sd7.pdf [file psp40004-0350-sd7.pdf]

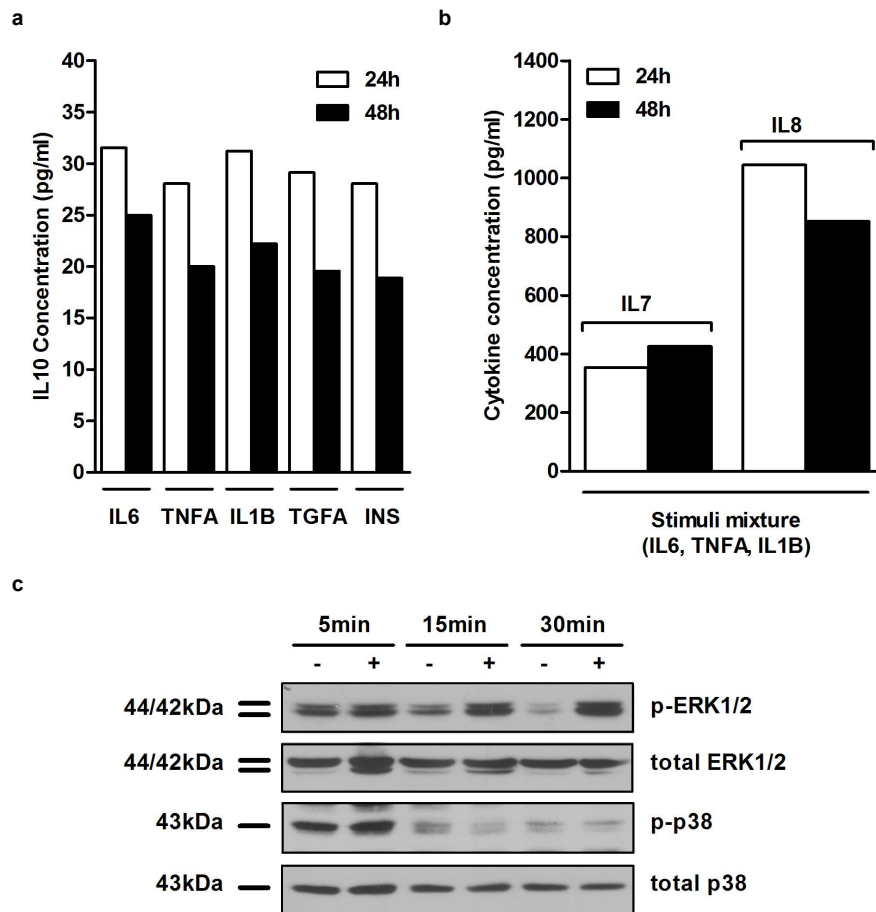

**Supplementary Figure S1:** Time-course preliminary experiments of (a, b) cytokines IL10, IL8, and IL7 secretion levels as determined by ELISA (DuoSet ELISA kit, R&D) 24 and 48 h post-treatment with the indicated stimuli and (c) phosphoprotein ERK1/2 and p38 activation levels as determined by western blot analysis of cell lysates from HEP3B cells stimulated with TGFA or IL1B respectively for 5, 15 and 30 min.
