# Supplementary material for: Network-Based Analysis of Nutraceuticals in Human Hepatocellular Carcinomas Reveals Mechanisms of Chemopreventive Action
Source: PubMed Central journal article supplement — CPT Pharmacometrics Syst Pharmacol. 2015 Jun 1;4(6):350–61. doi: 10.1002/psp4.40 (PMC4505829; doi:10.1002/psp4.40), 2015-06-01
Supplement: psp40004-0350-sd8.pdf [file psp40004-0350-sd8.pdf]

| BTC    | detection antibody conc. (ng/ml) | Recombinant Protein Concentration (pg/ml) |       |       |       |       |       | CCL20  | detection antibody conc. (ng/ml) | Recombinant Protein Concentration (pg/ml) |       |       |       |       |       | CCL26  | detection antibody conc. (ng/ml) | Recombinant Protein Concentration (pg/ml) |       |       |       |       |       |       |      |
|--------|----------------------------------|-------------------------------------------|-------|-------|-------|-------|-------|--------|----------------------------------|-------------------------------------------|-------|-------|-------|-------|-------|--------|----------------------------------|-------------------------------------------|-------|-------|-------|-------|-------|-------|------|
|        |                                  | 40000                                     | 20000 | 10000 | 5000  | 2500  | 0     |        |                                  | 40000                                     | 20000 | 10000 | 5000  | 2500  | 0     |        |                                  | 40000                                     | 20000 | 10000 | 5000  | 2500  | 0     |       |      |
|        | 2000                             | 24498                                     | 24576 | 24789 | 24818 | 24867 | 210   |        | 2000                             | 31349                                     | 31489 | 30930 | 28290 | 17308 | 59    |        | 2000                             | 29465                                     | 29753 | 27968 | 14784 | 6738  | 143   |       |      |
|        | 1000                             | 24462                                     | 24558 | 24274 | 24573 | 24585 | 184   |        | 1000                             | 31333                                     | 31309 | 30344 | 27411 | 15457 | 52    |        | 1000                             | 27510                                     | 23446 | 15432 | 7529  | 3359  | 64    |       |      |
|        | 500                              | 23937                                     | 24534 | 24553 | 24491 | 24374 | 104   |        | 500                              | 31358                                     | 30762 | 29831 | 26213 | 12700 | 42    |        | 500                              | 20251                                     | 15672 | 10283 | 5485  | 2322  | 42    |       |      |
|        | 250                              | 15257                                     | 21870 | 23015 | 23334 | 20601 | 101   |        | 250                              | 31055                                     | 30466 | 29517 | 22485 | 9867  | 42    |        | 250                              | 10874                                     | 10810 | 6760  | 3270  | 1453  | 33    |       |      |
|        | 125                              | 13266                                     | 14364 | 14067 | 13417 | 12651 | 60    |        | 125                              | 29928                                     | 29634 | 27980 | 17356 | 6949  | 41    |        | 125                              | 5513                                      | 4727  | 3482  | 1555  | 809   | 24    |       |      |
|        | 63                               | 6655                                      | 7353  | 7486  | 7857  | 8576  | 41    |        | 63                               | 29244                                     | 28708 | 24867 | 11014 | 4760  | 43    |        | 63                               | 2639                                      | 2775  | 2020  | 995   | 491   | 24    |       |      |
|        | 31                               | 3629                                      | 4164  | 3949  | 4757  | 4073  | 42    |        | 31                               | 26946                                     | 25158 | 15472 | 6564  | 3071  | 39    |        | 31                               | 1265                                      | 1418  | 932   | 543   | 323   | 17    |       |      |
| 16     | 1850                             | 2359                                      | 2147  | 2315  | 1892  | 23    | 0     | 40     | 41                               | 38                                        | 44    | 35    | 41    | 16    | 596   | 589    | 498                              | 358                                       | 197   | 12    |       |       |       |       |      |
| CSF2   | detection antibody conc. (ng/ml) | Recombinant Protein Concentration (pg/ml) |       |       |       |       |       | CTGF   | detection antibody conc. (ng/ml) | Recombinant Protein Concentration (pg/ml) |       |       |       |       |       | CXCL7  | detection antibody conc. (ng/ml) | Recombinant Protein Concentration (pg/ml) |       |       |       |       |       |       |      |
| 40000  |                                  | 20000                                     | 10000 | 5000  | 2500  | 0     | 40000 |        |                                  | 20000                                     | 10000 | 5000  | 2500  | 0     | 40000 |        |                                  | 20000                                     | 10000 | 5000  | 2500  | 0     |       |       |      |
| 2000   |                                  | 29367                                     | 25010 | 26989 | 12065 | 8372  | 93    |        |                                  | 2000                                      | 26760 | 26014 | 27279 | 28342 | 25892 |        |                                  | 1300                                      | 2000  | 24580 | 24595 | 25614 | 26577 | 26751 | 3404 |
| 1000   |                                  | 22599                                     | 16581 | 11401 | 8239  | 4604  | 63    |        |                                  | 1000                                      | 21596 | 27676 | 27898 | 25912 | 20502 |        |                                  | 617                                       | 1000  | 24803 | 24623 | 25511 | 26131 | 26885 | 1884 |
| 500    |                                  | 11432                                     | 8803  | 6186  | 4235  | 2622  | 43    |        |                                  | 500                                       | 6057  | 27952 | 28515 | 25022 | 14201 |        |                                  | 443                                       | 500   | 24559 | 24584 | 24571 | 25500 | 25651 | 1097 |
| 250    |                                  | 6008                                      | 4596  | 3309  | 2142  | 1257  | 23    |        |                                  | 250                                       | 20347 | 26957 | 27321 | 24185 | 20702 |        |                                  | 249                                       | 250   | 24461 | 24298 | 24636 | 25283 | 25222 | 469  |
| 125    |                                  | 3353                                      | 2351  | 1804  | 1074  | 687   | 16    |        |                                  | 125                                       | 14759 | 17157 | 19580 | 20655 | 15234 |        |                                  | 181                                       | 125   | 24069 | 24697 | 24511 | 24411 | 24818 | 1031 |
| 63     | 1631                             | 1240                                      | 880   | 561   | 375   | 22    | 63    | 12312  | 17859                            | 14176                                     | 8680  | 7141  | 96    | 63    | 23992 | 23681  | 24339                            | 23953                                     | 23737 | 154   |       |       |       |       |      |
| 31     | 853                              | 641                                       | 471   | 311   | 187   | 14    | 31    | 10436  | 9273                             | 9766                                      | 6008  | 4223  | 53    | 31    | 21541 | 23366  | 23148                            | 23609                                     | 23202 | 92    |       |       |       |       |      |
| 0      | 9                                | 13                                        | 11    | 10    | 14    | 13    | 16    | 3343   | 3587                             | 6497                                      | 4148  | 3185  | 45    | 16    | 15307 | 14775  | 11555                            | 11586                                     | 17176 | 48    |       |       |       |       |      |
| CXCL10 | detection antibody conc. (ng/ml) | Recombinant Protein Concentration (pg/ml) |       |       |       |       |       | CXCL11 | detection antibody conc. (ng/ml) | Recombinant Protein Concentration (pg/ml) |       |       |       |       |       | CXCL16 | detection antibody conc. (ng/ml) | Recombinant Protein Concentration (pg/ml) |       |       |       |       |       |       |      |
| 40000  |                                  | 20000                                     | 10000 | 5000  | 2500  | 0     | 40000 |        |                                  | 20000                                     | 10000 | 5000  | 2500  | 0     | 40000 |        |                                  | 20000                                     | 10000 | 5000  | 2500  | 0     |       |       |      |
| 2000   |                                  | 29580                                     | 31069 | 30891 | 29296 | 26278 | 28    |        |                                  | 2000                                      | 25046 | 29033 | 30963 | 31314 | 31018 |        |                                  | 425                                       | 2000  | 24613 | 25879 | 27958 | 28207 | 27730 | 351  |
| 1000   |                                  | 28855                                     | 30866 | 30205 | 28538 | 29307 | 23    |        |                                  | 1000                                      | 25528 | 27368 | 29469 | 30300 | 30473 |        |                                  | 174                                       | 1000  | 24820 | 25792 | 27498 | 27073 | 27213 | 166  |
| 500    |                                  | 29615                                     | 30620 | 29698 | 27389 | 23084 | 21    |        |                                  | 500                                       | 23674 | 27375 | 27731 | 29239 | 29167 |        |                                  | 209                                       | 500   | 24403 | 25342 | 26780 | 26366 | 26777 | 151  |
| 250    |                                  | 29597                                     | 30572 | 29537 | 26746 | 19991 | 26    |        |                                  | 250                                       | 21734 | 22797 | 24582 | 25980 | 25923 |        |                                  | 114                                       | 250   | 24533 | 24887 | 25220 | 25573 | 24872 | 72   |
| 125    |                                  | 28967                                     | 29672 | 28277 | 24577 | 16469 | 36    |        |                                  | 125                                       | 13216 | 16133 | 17442 | 17383 | 19094 |        |                                  | 113                                       | 125   | 23880 | 23929 | 24796 | 24674 | 23723 | 47   |
| 63     | 27940                            | 28319                                     | 25676 | 18280 | 11036 | 19    | 63    | 8585   | 10842                            | 12020                                     | 11284 | 11236 | 123   | 63    | 20753 | 23205  | 23184                            | 22893                                     | 22021 | 70    |       |       |       |       |      |
| 31     | 26183                            | 25036                                     | 19956 | 11157 | 6495  | 11    | 31    | 4874   | 5699                             | 5903                                      | 7157  | 6305  | 131   | 31    | 15433 | 16625  | 15997                            | 15662                                     | 16203 | 42    |       |       |       |       |      |
| 16     | 20470                            | 17944                                     | 13597 | 6601  | 3372  | 12    | 16    | 2390   | 3033                             | 3798                                      | 3323  | 3137  | 27    | 16    | 10673 | 10653  | 9709                             | 9801                                      | 10735 | 23    |       |       |       |       |      |
| GROA   | detection antibody conc. (ng/ml) | Recombinant Protein Concentration (pg/ml) |       |       |       |       |       | HAVR1  | detection antibody conc. (ng/ml) | Recombinant Protein Concentration (pg/ml) |       |       |       |       |       | IFNG   | detection antibody conc. (ng/ml) | Recombinant Protein Concentration (pg/ml) |       |       |       |       |       |       |      |
| 40000  |                                  | 20000                                     | 10000 | 5000  | 2500  | 0     | 40000 |        |                                  | 20000                                     | 10000 | 5000  | 2500  | 0     | 40000 |        |                                  | 20000                                     | 10000 | 5000  | 2500  | 0     |       |       |      |
| 2000   |                                  | 30547                                     | 31322 | 31563 | 31788 | 30811 | 388   |        |                                  | 2000                                      | 30630 | 28890 | 24643 | 14818 | 7359  |        |                                  | 68                                        | 2000  | 23894 | 15921 | 8633  | 4808  | 2619  | 48   |
| 1000   |                                  | 30040                                     | 30385 | 30532 | 30644 | 29922 | 181   |        |                                  | 1000                                      | 29070 | 26921 | 16847 | 9987  | 4801  |        |                                  | 60                                        | 1000  | 17073 | 10989 | 5759  | 2719  | 1465  | 34   |
| 500    |                                  | 29884                                     | 12    | 29912 | 29538 | 28976 | 124   |        |                                  | 500                                       | 27449 | 20459 | 11582 | 5579  | 2903  |        |                                  | 46                                        | 500   | 10363 | 6889  | 3379  | 1736  | 827   | 20   |
| 250    |                                  | 28141                                     | 18855 | 27735 | 21727 | 26440 | 129   |        |                                  | 250                                       | 21259 | 12814 | 7002  | 3377  | 1588  |        |                                  | 48                                        | 250   | 6130  | 3740  | 2108  | 929   | 540   | 15   |
| 125    |                                  | 23705                                     | 24111 | 24450 | 24644 | 23115 | 120   |        |                                  | 125                                       | 14405 | 7416  | 3935  | 1897  | 884   |        |                                  | 37                                        | 125   | 4090  | 1964  | 1071  | 503   | 300   | 16   |
| 63     | 9673                             | 17301                                     | 17454 | 17635 | 14905 | 76    | 63    | 7263   | 4423                             | 2243                                      | 1043  | 518   | 39    | 63    | 1760  | 1103   | 453                              | 245                                       | 161   | 8     |       |       |       |       |      |
| 31     | 9037                             | 10175                                     | 10261 | 8470  | 9277  | 34    | 31    | 3370   | 2004                             | 1043                                      | 522   | 274   | 42    | 31    | 912   | 446    | 296                              | 138                                       | 83    | 10    |       |       |       |       |      |
| 0      | 16                               | 10                                        | 12    | 9     | 13    | 11    | 0     | 55     | 76                               | 54                                        | 49    | 43    | 37    | 16    | 597   | 264    | 149                              | 73                                        | 35    | 8     |       |       |       |       |      |
| IL13   | detection antibody conc. (ng/ml) | Recombinant Protein Concentration (pg/ml) |       |       |       |       |       | IL17A  | detection antibody conc. (ng/ml) | Recombinant Protein Concentration (pg/ml) |       |       |       |       |       | IL17F  | detection antibody conc. (ng/ml) | Recombinant Protein Concentration (pg/ml) |       |       |       |       |       |       |      |
| 40000  |                                  | 20000                                     | 10000 | 5000  | 2500  | 0     | 40000 |        |                                  | 20000                                     | 10000 | 5000  | 2500  | 0     | 40000 |        |                                  | 20000                                     | 10000 | 5000  | 2500  | 0     |       |       |      |
| 2000   |                                  | 26496                                     | 26394 | 21294 | 13248 | 7820  | 187   |        |                                  | 2000                                      | 10516 | 12474 | 12756 | 11512 | 7948  |        |                                  | 38                                        | 2000  | 24605 | 24364 | 24102 | 17719 | 10571 | 327  |
| 1000   |                                  | 24123                                     | 22637 | 12949 | 8511  | 4717  | 98    |        |                                  | 1000                                      | 5850  | 7759  | 9774  | 6885  | 4794  |        |                                  | 23                                        | 1000  | 24740 | 24281 | 21035 | 13203 | 7690  | 85   |
| 500    |                                  | 22928                                     | 16428 | 7989  | 4586  | 2548  | 65    |        |                                  | 500                                       | 3168  | 3392  | 3639  | 3458  | 2180  |        |                                  | 20                                        | 500   | 24433 | 23176 | 15189 | 9015  | 5344  | 57   |
| 250    |                                  | 15000                                     | 9512  | 5648  | 2430  | 1416  | 23    |        |                                  | 250                                       | 1548  | 1720  | 1926  | 1660  | 894   |        |                                  | 16                                        | 250   | 23532 | 17981 | 11045 | 5412  | 3229  | 26   |
| 125    |                                  | 9368                                      | 5706  | 3098  | 1601  | 794   | 19    |        |                                  | 125                                       | 647   | 846   | 1020  | 553   | 538   |        |                                  | 19                                        | 125   | 16486 | 11050 | 6882  | 5963  | 2050  | 22   |
| 63     | 4963                             | 2826                                      | 1727  | 892   | 488   | 20    | 63    | 339    | 451                              | 363                                       | 445   | 409   | 20    | 63    | 9856  | 6722   | 3882                             | 1851                                      | 1134  | 23    |       |       |       |       |      |
| 31     | 2593                             | 1492                                      | 880   | 499   | 261   | 12    | 31    | 177    | 285                              | 416                                       | 226   | 157   | 14    | 31    | 5351  | 3852   | 2047                             | 948                                       | 556   | 18    |       |       |       |       |      |
| 16     | 1388                             | 817                                       | 476   | 251   | 116   | 12    | 0     | 12     | 13                               | 13                                        | 12    | 12    | 14    | 16    | 3485  | 2039   | 1123                             | 633                                       | 329   | 18    |       |       |       |       |      |
| IL1A   | detection antibody conc. (ng/ml) | Recombinant Protein Concentration (pg/ml) |       |       |       |       |       | IL1B   | detection antibody conc. (ng/ml) | Recombinant Protein Concentration (pg/ml) |       |       |       |       |       | IL3    | detection antibody conc. (ng/ml) | Recombinant Protein Concentration (pg/ml) |       |       |       |       |       |       |      |
| 40000  |                                  | 20000                                     | 10000 | 5000  | 2500  | 0     | 40000 |        |                                  | 20000                                     | 10000 | 5000  | 2500  | 0     | 40000 |        |                                  | 20000                                     | 10000 | 5000  | 2500  | 0     |       |       |      |
| 2000   |                                  | 32014                                     | 31952 | 31415 | 28852 | 27810 | 287   |        |                                  | 2000                                      | 32128 | 32037 | 31762 | 31648 | 31020 |        |                                  | 94                                        | 2000  | 24398 | 24394 | 24257 | 24239 | 24567 | 1834 |
| 1000   |                                  | 31836                                     | 31737 | 30723 | 28643 | 27480 | 90    |        |                                  | 1000                                      | 32077 | 32040 | 31973 | 31623 | 30527 |        |                                  | 139                                       | 1000  | 24261 | 24004 | 24113 | 24359 | 24203 | 971  |
| 500    |                                  | 31849                                     | 31239 | 29795 | 28027 | 26195 | 90    |        |                                  | 500                                       | 32060 | 31915 | 31814 | 31390 | 30241 |        |                                  | 92                                        | 500   | 24216 | 24403 | 23990 | 23579 | 22830 | 448  |
| 250    |                                  | 31382                                     | 31015 | 28736 | 27294 | 25616 | 63    |        |                                  | 250                                       | 31421 | 31820 | 31453 | 30776 | 29093 |        |                                  | 83                                        | 250   | 24307 | 23989 | 23909 | 21073 | 15943 | 448  |
| 125    |                                  | 30940                                     | 29972 | 28490 | 25695 | 23977 | 28    |        |                                  | 125                                       | 30654 | 30842 | 30412 | 29628 | 27171 |        |                                  | 119                                       | 125   | 22872 | 21030 | 16261 | 12522 | 9062  | 143  |
| 63     | 29828                            | 28841                                     | 26450 | 23417 | 20538 | 34    | 63    | 29193  | 28921                            | 28537                                     | 26704 | 20639 | 64    | 63    | 15775 | 13413  | 8921                             | 6528                                      | 5636  | 43    |       |       |       |       |      |
| 31     | 27561                            | 26253                                     | 23527 | 21107 | 12675 | 28    | 31    | 24001  | 24396                            | 22956                                     | 18132 | 12380 | 98    | 31    | 10299 | 7372   | 6783                             | 3791                                      | 2458  | 30    |       |       |       |       |      |
| 16     | 21073                            | 21435                                     | 18294 | 12909 | 7122  | 17    | 0     | 45     | 52                               | 51                                        | 55    | 44    | 48    | 16    | 5869  | 4793   | 3275                             | 2479                                      | 1676  | 20    |       |       |       |       |      |
| IL4    | detection antibody conc. (ng/ml) | Recombinant Protein Concentration (pg/ml) |       |       |       |       |       | IL6    | detection antibody conc. (ng/ml) | Recombinant Protein Concentration (pg/ml) |       |       |       |       |       | MIA2   | detection antibody conc. (ng/ml) | Recombinant Protein Concentration (pg/ml) |       |       |       |       |       |       |      |
| 40000  |                                  | 20000                                     | 10000 | 5000  | 2500  | 0     | 40000 |        |                                  | 20000                                     | 10000 | 5000  | 2500  | 0     | 40000 |        |                                  | 20000                                     | 10000 | 5000  | 2500  | 0     |       |       |      |
| 2000   |                                  | 26719                                     | 29431 | 31018 | 31341 | 30704 | 93    |        |                                  | 2000                                      | 32105 | 32138 | 32387 | 32263 | 31862 |        |                                  | 11343                                     | 2000  | 23969 | 26075 | 28847 | 28747 | 27685 | 696  |
| 1000   |                                  | 25139                                     | 28965 | 29919 | 30248 | 29211 | 43    |        |                                  | 1000                                      | 31843 | 31963 | 31673 | 31720 | 31225 |        |                                  | 1542                                      | 1000  | 22994 | 27200 | 28292 | 26933 | 23778 | 254  |
| 500    |                                  | 25252                                     | 28376 | 29445 | 29638 | 28110 | 35    |        |                                  | 500                                       | 31181 | 31170 | 31130 | 30970 | 30509 |        |                                  | 1043                                      | 500   | 23463 | 22780 | 25142 | 21804 | 16816 | 224  |
| 250    |                                  | 24924                                     | 27639 | 28775 | 28239 | 26273 | 35    |        |                                  | 250                                       | 30020 | 30244 | 30260 | 30170 | 29673 |        |                                  | 679                                       | 250   | 17384 | 19032 | 16934 | 14654 | 11113 | 110  |
| 125    |                                  | 24402                                     | 26811 | 27355 | 26436 | 21434 | 17    |        |                                  | 125                                       | 27464 | 28133 | 27759 | 27958 | 26870 |        |                                  | 398                                       | 125   | 10512 | 10867 | 11285 | 8680  | 5513  | 53   |
| 63     | 23981                            | 24552                                     | 25979 | 20177 | 16176 | 18    | 63    | 21104  | 23436</                          |                                           |       |       |       |       |       |        |                                  |                                           |       |       |       |       |       |       |      |
