# Supplementary material for: Network-Based Analysis of Nutraceuticals in Human Hepatocellular Carcinomas Reveals Mechanisms of Chemopreventive Action
Source: PubMed Central journal article supplement — CPT Pharmacometrics Syst Pharmacol. 2015 Jun 1;4(6):350–61. doi: 10.1002/psp4.40 (PMC4505829; doi:10.1002/psp4.40), 2015-06-01
Supplement: psp40004-0350-sd9.pdf [file psp40004-0350-sd9.pdf]

|        | BTC   | CCL20  | CCL26 | CSF2  | CTGF | CXCL7 | CXCL10 | CXCL11 | CXCL16 | GROA  | HAVR1 | IFNG  | IL13  | IL17F | IL1A   | IL1B   | IL3   | IL4   | IL8   | MIA2  | NGAL  | PDGFB | PLGF  | SCF   | TNFA   | TNR11  | THPO  |
|--------|-------|--------|-------|-------|------|-------|--------|--------|--------|-------|-------|-------|-------|-------|--------|--------|-------|-------|-------|-------|-------|-------|-------|-------|--------|--------|-------|
| BTC    | 11556 | 383    | 952   | 4072  | 833  | 652   | 186    | 723    | 714    | 860   | 462   | 419   | 552   | 652   | 431    | 505    | 1053  | 481   | 1572  | 4193  | 2781  | 869   | 15176 | 1445  | 494    | 3889   | 2392  |
| CCL20  | 1080  | 120045 | 903   | 4672  | 835  | 619   | 164    | 666    | 711    | 854   | 516   | 419   | 554   | 665   | 1537   | 527    | 1125  | 477   | 1928  | 4686  | 2652  | 866   | 15627 | 1403  | 4250   | 3372   | 2477  |
| CCL26  | 3139  | 339    | 42795 | 4706  | 843  | 624   | 174    | 666    | 755    | 855   | 448   | 402   | 547   | 707   | 401    | 508    | 1295  | 444   | 1543  | 5436  | 2625  | 847   | 18225 | 1430  | 430    | 4402   | 2389  |
| CSF2   | 1100  | 324    | 868   | 49635 | 710  | 580   | 269    | 625    | 690    | 771   | 417   | 354   | 1313  | 647   | 421    | 521    | 912   | 426   | 1485  | 4463  | 2777  | 783   | 11223 | 1367  | 410    | 3441   | 2090  |
| CTGF   | 1299  | 334    | 902   | 4315  | 3730 | 852   | 192    | 687    | 669    | 847   | 422   | 373   | 534   | 645   | 380    | 525    | 1167  | 417   | 1553  | 5115  | 2445  | 778   | 15984 | 1416  | 403    | 3602   | 2201  |
| CXCL7  | 1121  | 304    | 883   | 3326  | 714  | 22309 | 166    | 561    | 563    | 890   | 429   | 374   | 475   | 603   | 953    | 471    | 962   | 375   | 2103  | 3751  | 2657  | 802   | 11406 | 1143  | 404    | 3267   | 2197  |
| CXCL10 | 1085  | 380    | 848   | 3511  | 818  | 641   | 131130 | 560    | 640    | 973   | 423   | 362   | 501   | 585   | 404    | 481    | 1024  | 373   | 1631  | 4250  | 2368  | 766   | 12390 | 1267  | 616    | 3554   | 2084  |
| CXCL11 | 1162  | 326    | 918   | 3833  | 755  | 617   | 154    | 12128  | 988    | 888   | 435   | 362   | 469   | 629   | 1772   | 674    | 1035  | 426   | 1477  | 3756  | 2145  | 790   | 10913 | 1269  | 384    | 3210   | 2317  |
| CXCL16 | 1493  | 405    | 948   | 8342  | 983  | 792   | 180    | 784    | 60259  | 1389  | 454   | 394   | 557   | 774   | 385    | 491    | 1327  | 490   | 2222  | 8320  | 5229  | 814   | 29057 | 3876  | 519    | 5339   | 2288  |
| GROA   | 1271  | 351    | 938   | 5097  | 924  | 8742  | 167    | 691    | 704    | 86720 | 456   | 397   | 1369  | 592   | 393    | 490    | 1159  | 550   | 5079  | 5236  | 2496  | 826   | 22562 | 1461  | 447    | 4883   | 2132  |
| HAVR1  | 1193  | 1728   | 1735  | 5582  | 856  | 623   | 173    | 747    | 763    | 836   | 88682 | 412   | 569   | 656   | 420    | 545    | 1260  | 453   | 1950  | 5330  | 2720  | 845   | 17430 | 1632  | 538    | 3899   | 2287  |
| IFNG   | 1270  | 389    | 936   | 5804  | 902  | 666   | 203    | 668    | 706    | 859   | 1677  | 33936 | 600   | 670   | 597    | 524    | 2027  | 461   | 2724  | 5479  | 4293  | 851   | 21871 | 1383  | 471    | 11323  | 2578  |
| IL13   | 1135  | 475    | 872   | 3546  | 841  | 596   | 721    | 631    | 741    | 734   | 412   | 426   | 40511 | 1105  | 417    | 453    | 1007  | 477   | 1465  | 3592  | 2161  | 865   | 10714 | 1380  | 440    | 3530   | 2229  |
| IL17F  | 1642  | 1141   | 1051  | 4384  | 1257 | 791   | 4639   | 753    | 951    | 1067  | 870   | 861   | 700   | 65035 | 485    | 572    | 1380  | 702   | 1706  | 5696  | 2752  | 1136  | 16172 | 2105  | 749    | 4268   | 2454  |
| IL1A   | 2246  | 303    | 833   | 3941  | 730  | 547   | 148    | 601    | 603    | 787   | 405   | 361   | 484   | 560   | 128938 | 468    | 1064  | 404   | 1439  | 3723  | 2129  | 754   | 12554 | 2128  | 391    | 3125   | 2235  |
| IL1B   | 1212  | 398    | 923   | 5231  | 803  | 592   | 156    | 701    | 766    | 824   | 427   | 416   | 546   | 648   | 435    | 104704 | 1191  | 458   | 1973  | 7694  | 2578  | 842   | 22147 | 1293  | 406    | 4672   | 2237  |
| IL3    | 1094  | 327    | 811   | 3704  | 879  | 572   | 183    | 603    | 726    | 788   | 403   | 382   | 534   | 646   | 384    | 472    | 12086 | 473   | 1395  | 3900  | 2225  | 829   | 12197 | 1334  | 436    | 18341  | 2098  |
| IL4    | 1220  | 342    | 833   | 3399  | 763  | 871   | 149    | 622    | 616    | 766   | 416   | 377   | 443   | 612   | 353    | 474    | 1090  | 36451 | 1532  | 4193  | 2251  | 786   | 19944 | 1323  | 395    | 3596   | 2271  |
| IL8    | 1102  | 287    | 812   | 3550  | 761  | 4032  | 153    | 604    | 563    | 3130  | 416   | 345   | 524   | 598   | 358    | 461    | 1017  | 969   | 51354 | 3722  | 2107  | 761   | 10968 | 1262  | 383    | 4139   | 2196  |
| MIA2   | 1278  | 342    | 888   | 7048  | 885  | 575   | 145    | 631    | 687    | 781   | 435   | 345   | 498   | 615   | 356    | 3068   | 1216  | 419   | 1354  | 33821 | 2351  | 762   | 29830 | 1565  | 387    | 4696   | 2452  |
| NGAL   | 1320  | 306    | 1171  | 4359  | 780  | 558   | 322    | 636    | 637    | 825   | 444   | 606   | 534   | 682   | 372    | 523    | 1198  | 409   | 1726  | 4135  | 26115 | 894   | 13591 | 1354  | 416    | 3601   | 2896  |
| PDGFB  | 1104  | 431    | 820   | 3253  | 765  | 587   | 192    | 591    | 652    | 750   | 427   | 402   | 476   | 584   | 1457   | 467    | 1033  | 394   | 1367  | 3542  | 2140  | 34743 | 10942 | 1174  | 396    | 3704   | 2480  |
| PLGF   | 1129  | 315    | 860   | 3711  | 802  | 612   | 180    | 627    | 714    | 810   | 417   | 395   | 578   | 650   | 1422   | 502    | 1067  | 453   | 1469  | 4039  | 2584  | 813   | 91127 | 1206  | 410    | 3009   | 2314  |
| SCF    | 1448  | 377    | 901   | 9816  | 943  | 864   | 168    | 702    | 824    | 3447  | 473   | 392   | 593   | 756   | 446    | 478    | 1325  | 485   | 1847  | 7825  | 2980  | 792   | 32575 | 60789 | 500    | 4943   | 2175  |
| TNFA   | 1295  | 317    | 898   | 4245  | 945  | 673   | 180    | 665    | 1712   | 824   | 437   | 377   | 571   | 632   | 393    | 478    | 1346  | 452   | 1535  | 4482  | 2381  | 857   | 13307 | 1431  | 118649 | 3646   | 1975  |
| TNR11  | 1222  | 312    | 967   | 4470  | 1320 | 563   | 198    | 763    | 735    | 803   | 421   | 478   | 753   | 693   | 377    | 490    | 1063  | 483   | 1533  | 4413  | 2419  | 763   | 13796 | 1236  | 472    | 193926 | 2204  |
| THPO   | 1240  | 987    | 949   | 5641  | 816  | 633   | 194    | 758    | 813    | 850   | 428   | 408   | 578   | 662   | 386    | 491    | 1220  | 524   | 1516  | 4800  | 2566  | 1166  | 21847 | 1296  | 480    | 5138   | 26992 |

**Supplementary Figure S3.** Specificity profile of xMAP assays. Each row corresponds to an experiment measuring the specified recombinant protein with the 27 cytokines used multiplexed all together. Each column corresponds to the specified bead measurements. All recombinant proteins were used at 40ng/ml. Color-formatting has been applied at every column to depict lower (green) to higher (red) values. The values are in fluorescence intensity units.
