# Supplementary material for: Network-Based Analysis of Nutraceuticals in Human Hepatocellular Carcinomas Reveals Mechanisms of Chemopreventive Action
Source: PubMed Central journal article supplement — CPT Pharmacometrics Syst Pharmacol. 2015 Jun 1;4(6):350–61. doi: 10.1002/psp4.40 (PMC4505829; doi:10.1002/psp4.40), 2015-06-01
Supplement: psp40004-0350-sd10.pdf [file psp40004-0350-sd10.pdf]

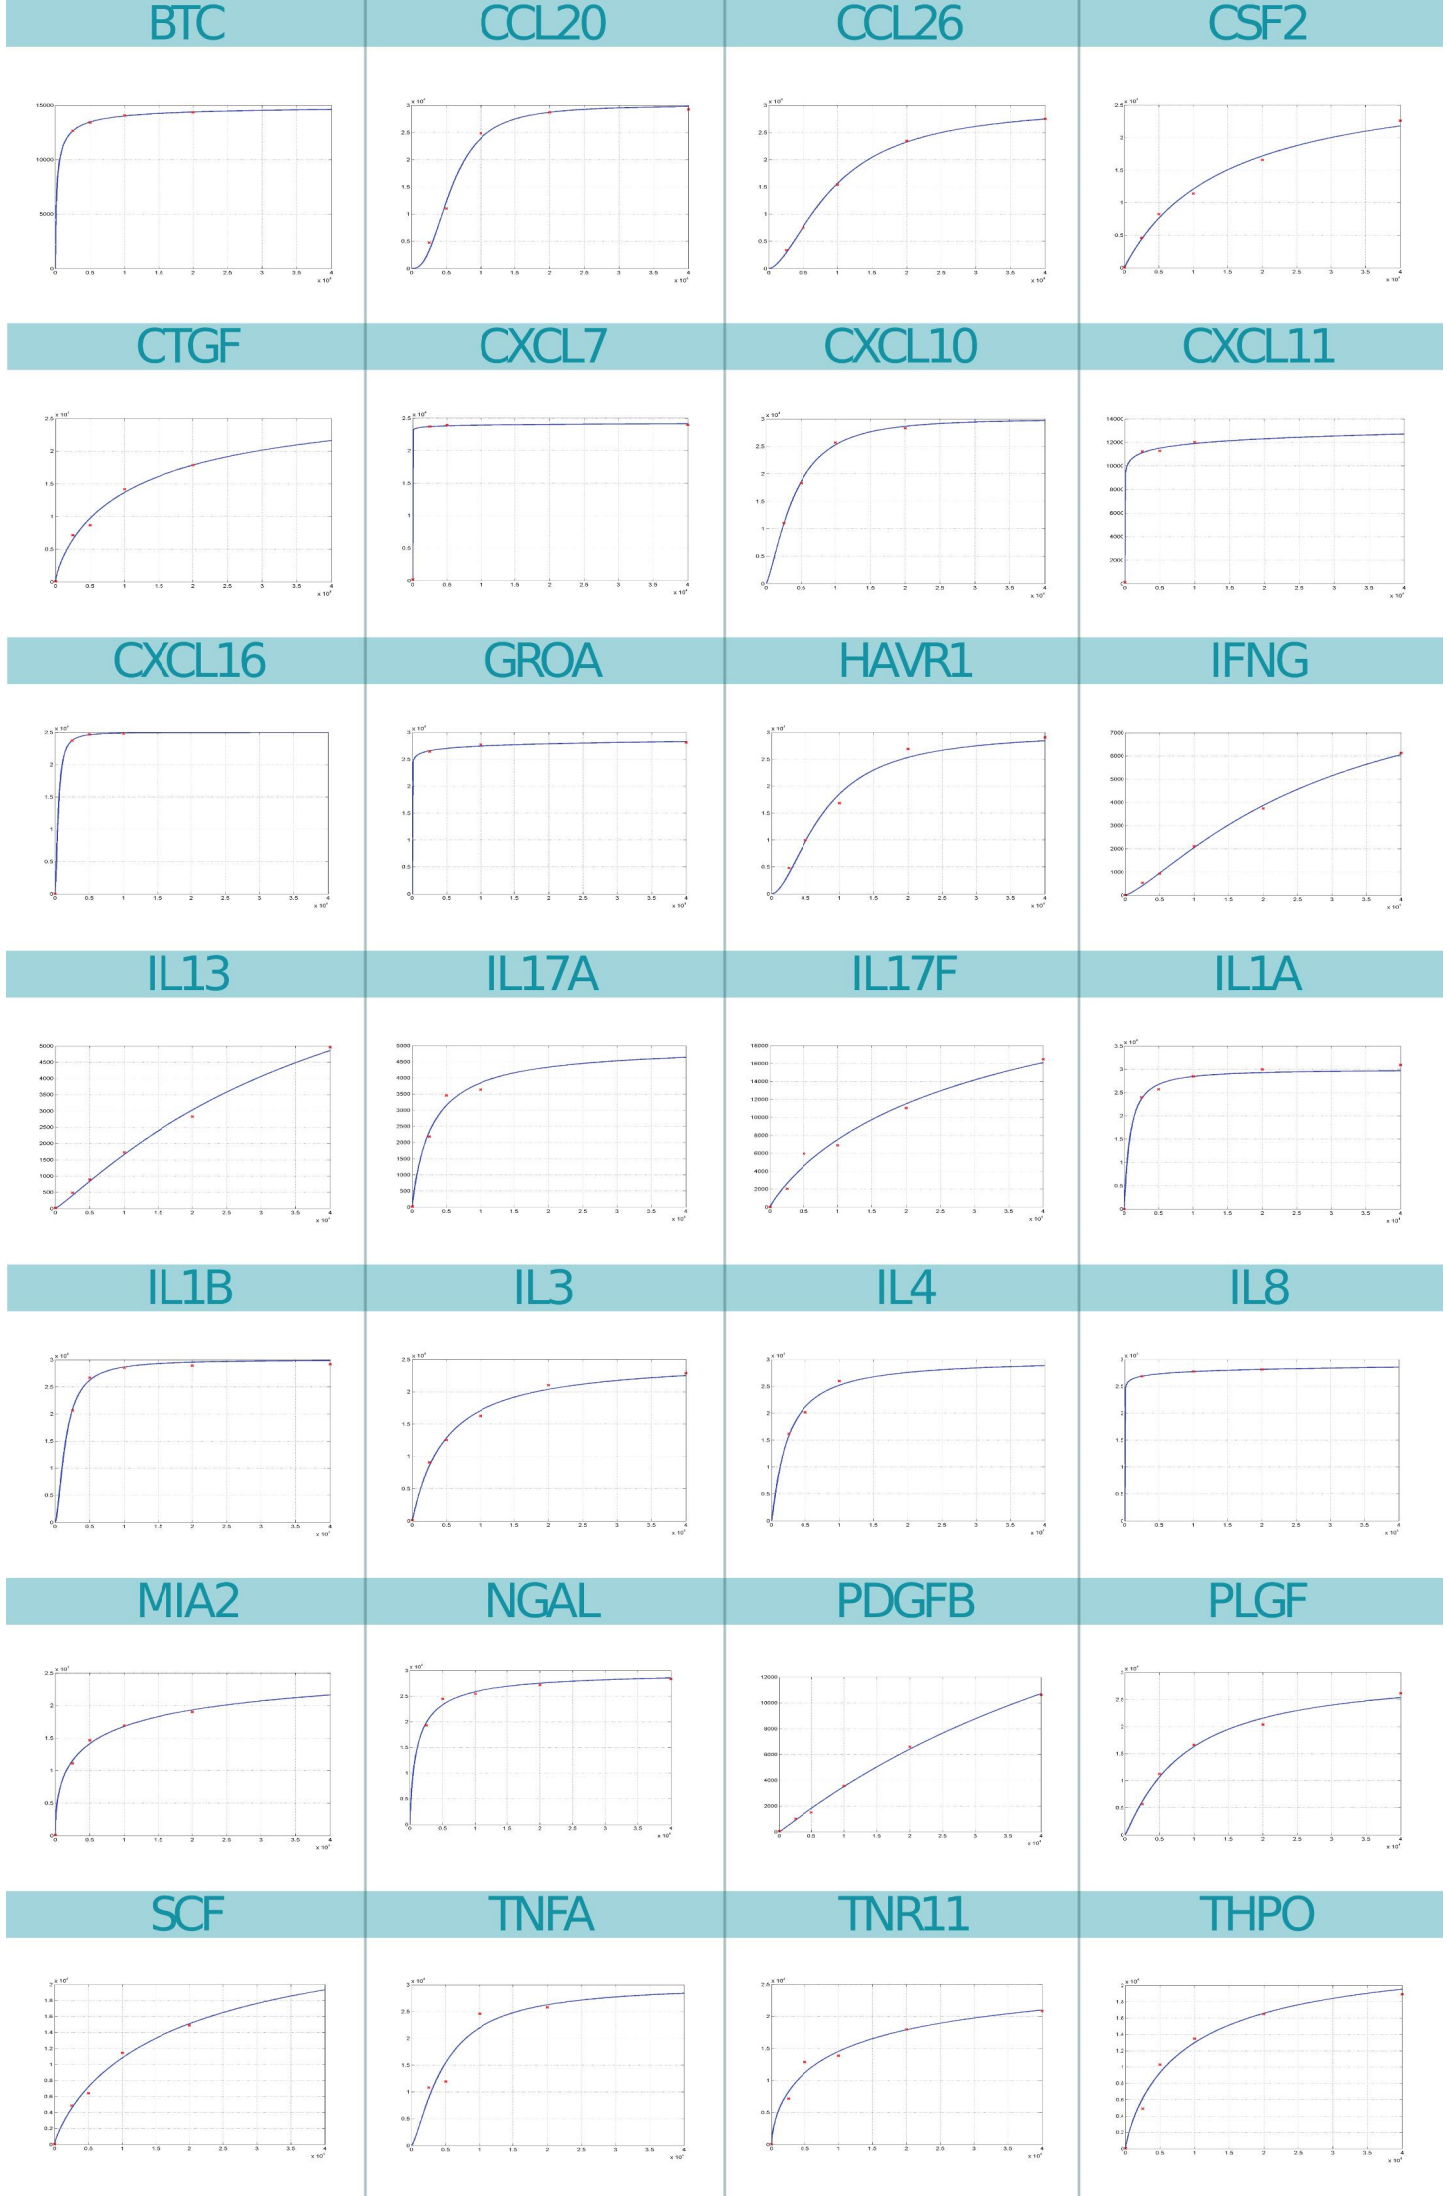

**Supplementary Figure S4.** Sensitivity curves created using a 4-parameter logistic non-linear regression model for each cytokine assay using the data of Supplementary Figure S2. For each plot, X axis represents recombinant protein concentration (pg/ml) and Y axis the fluorescent intensity units.
