# Supplementary material for: Network-Based Analysis of Nutraceuticals in Human Hepatocellular Carcinomas Reveals Mechanisms of Chemopreventive Action
Source: PubMed Central journal article supplement — CPT Pharmacometrics Syst Pharmacol. 2015 Jun 1;4(6):350–61. doi: 10.1002/psp4.40 (PMC4505829; doi:10.1002/psp4.40), 2015-06-01
Supplement: psp40004-0350-sd11.pdf [file psp40004-0350-sd11.pdf]

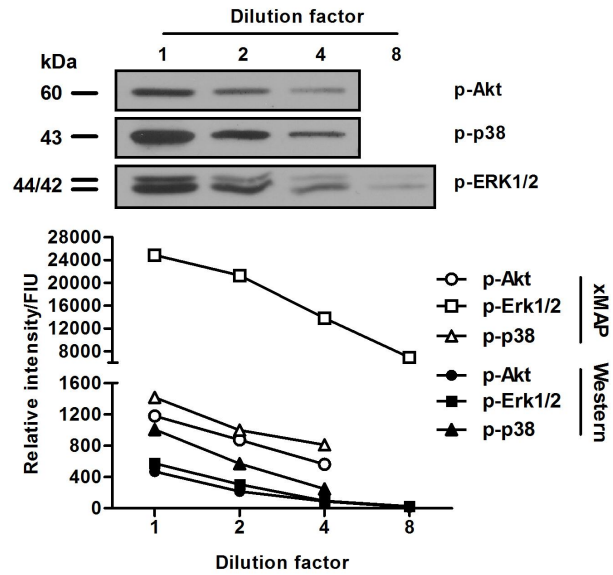

**Supplementary Figure S5.** Validation of xMAP phosphoprotein assay linearity. Serial 2-fold dilutions of cell lysates from stimulated with TGFA or IL1B HEP3B cells were analyzed in parallel for phosphorylated Akt, p38 and ERK1/2 using xMAP and Western blot analysis.
