# Supplementary material for: Network-Based Analysis of Nutraceuticals in Human Hepatocellular Carcinomas Reveals Mechanisms of Chemopreventive Action
Source: PubMed Central journal article supplement — CPT Pharmacometrics Syst Pharmacol. 2015 Jun 1;4(6):350–61. doi: 10.1002/psp4.40 (PMC4505829; doi:10.1002/psp4.40), 2015-06-01
Supplement: psp40004-0350-sd12.pdf [file psp40004-0350-sd12.pdf]

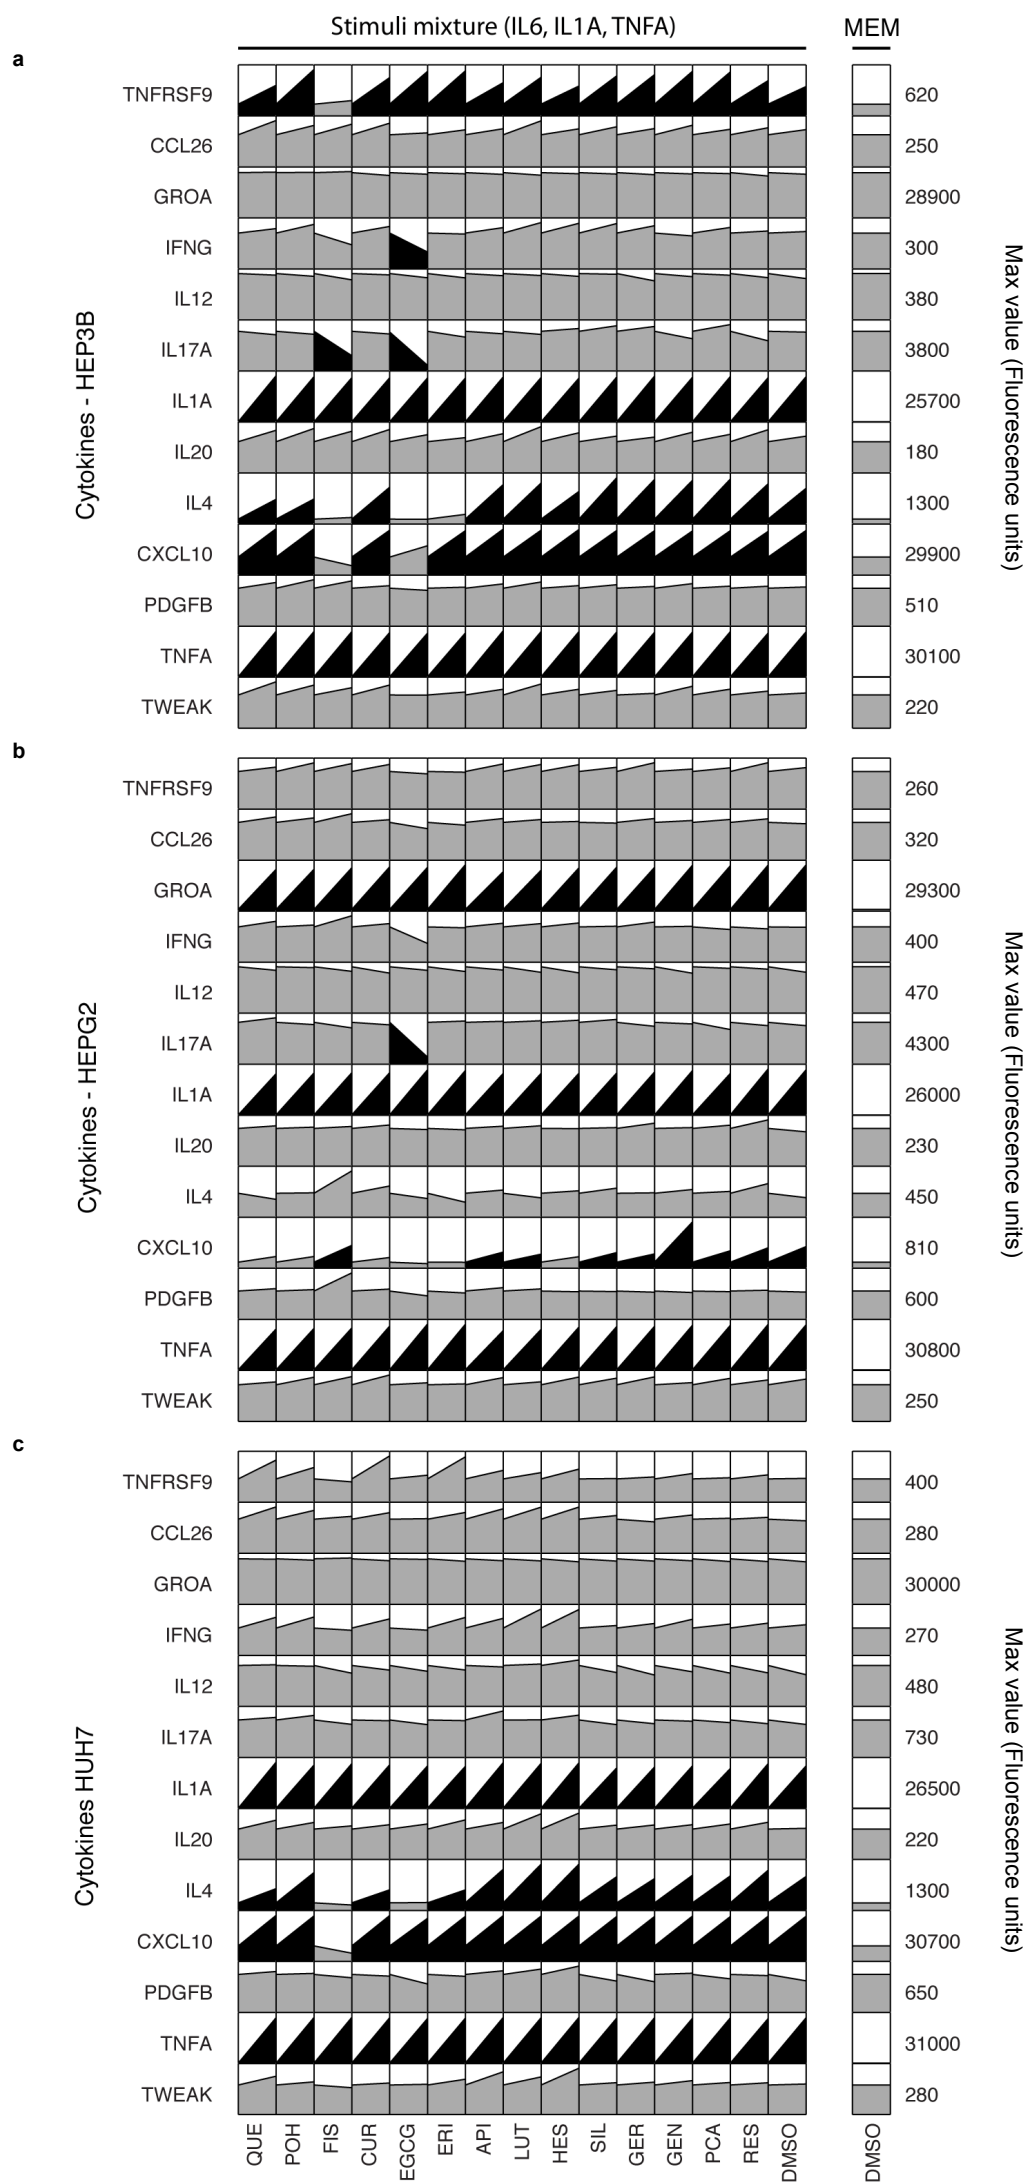

**Supplementary Figure S6:** Preliminary cytokines datasets from (a) HEP3B, (b) HEPG2 and (c) HUH7 cells. Rows represent measurements of 13 cytokines assayed in cell supernatants 24 h post treatment with a stimuli mixture (IL6, IL1A and TNFA) or medium (MEM). Columns represent each of 14 different compounds or DMSO. Black color highlights signals that exceeded a 2-fold threshold alteration compared to DMSO-MEM. Numbers indicate max values of fluorescence units. Abbreviations: TNFRSF 9, TNF receptor superfamily member 9; TWEAK, TNF-related weak inducer of apoptosis (alternate name: tumor necrosis factor ligand superfamily member 12)
