# Supplementary material for: Network-Based Analysis of Nutraceuticals in Human Hepatocellular Carcinomas Reveals Mechanisms of Chemopreventive Action
Source: PubMed Central journal article supplement — CPT Pharmacometrics Syst Pharmacol. 2015 Jun 1;4(6):350–61. doi: 10.1002/psp4.40 (PMC4505829; doi:10.1002/psp4.40), 2015-06-01
Supplement: psp40004-0350-sd15.pdf [file psp40004-0350-sd15.pdf]

**Appendix II.** Cytokine dataset transformation to actual protein concentration (pg/ml)

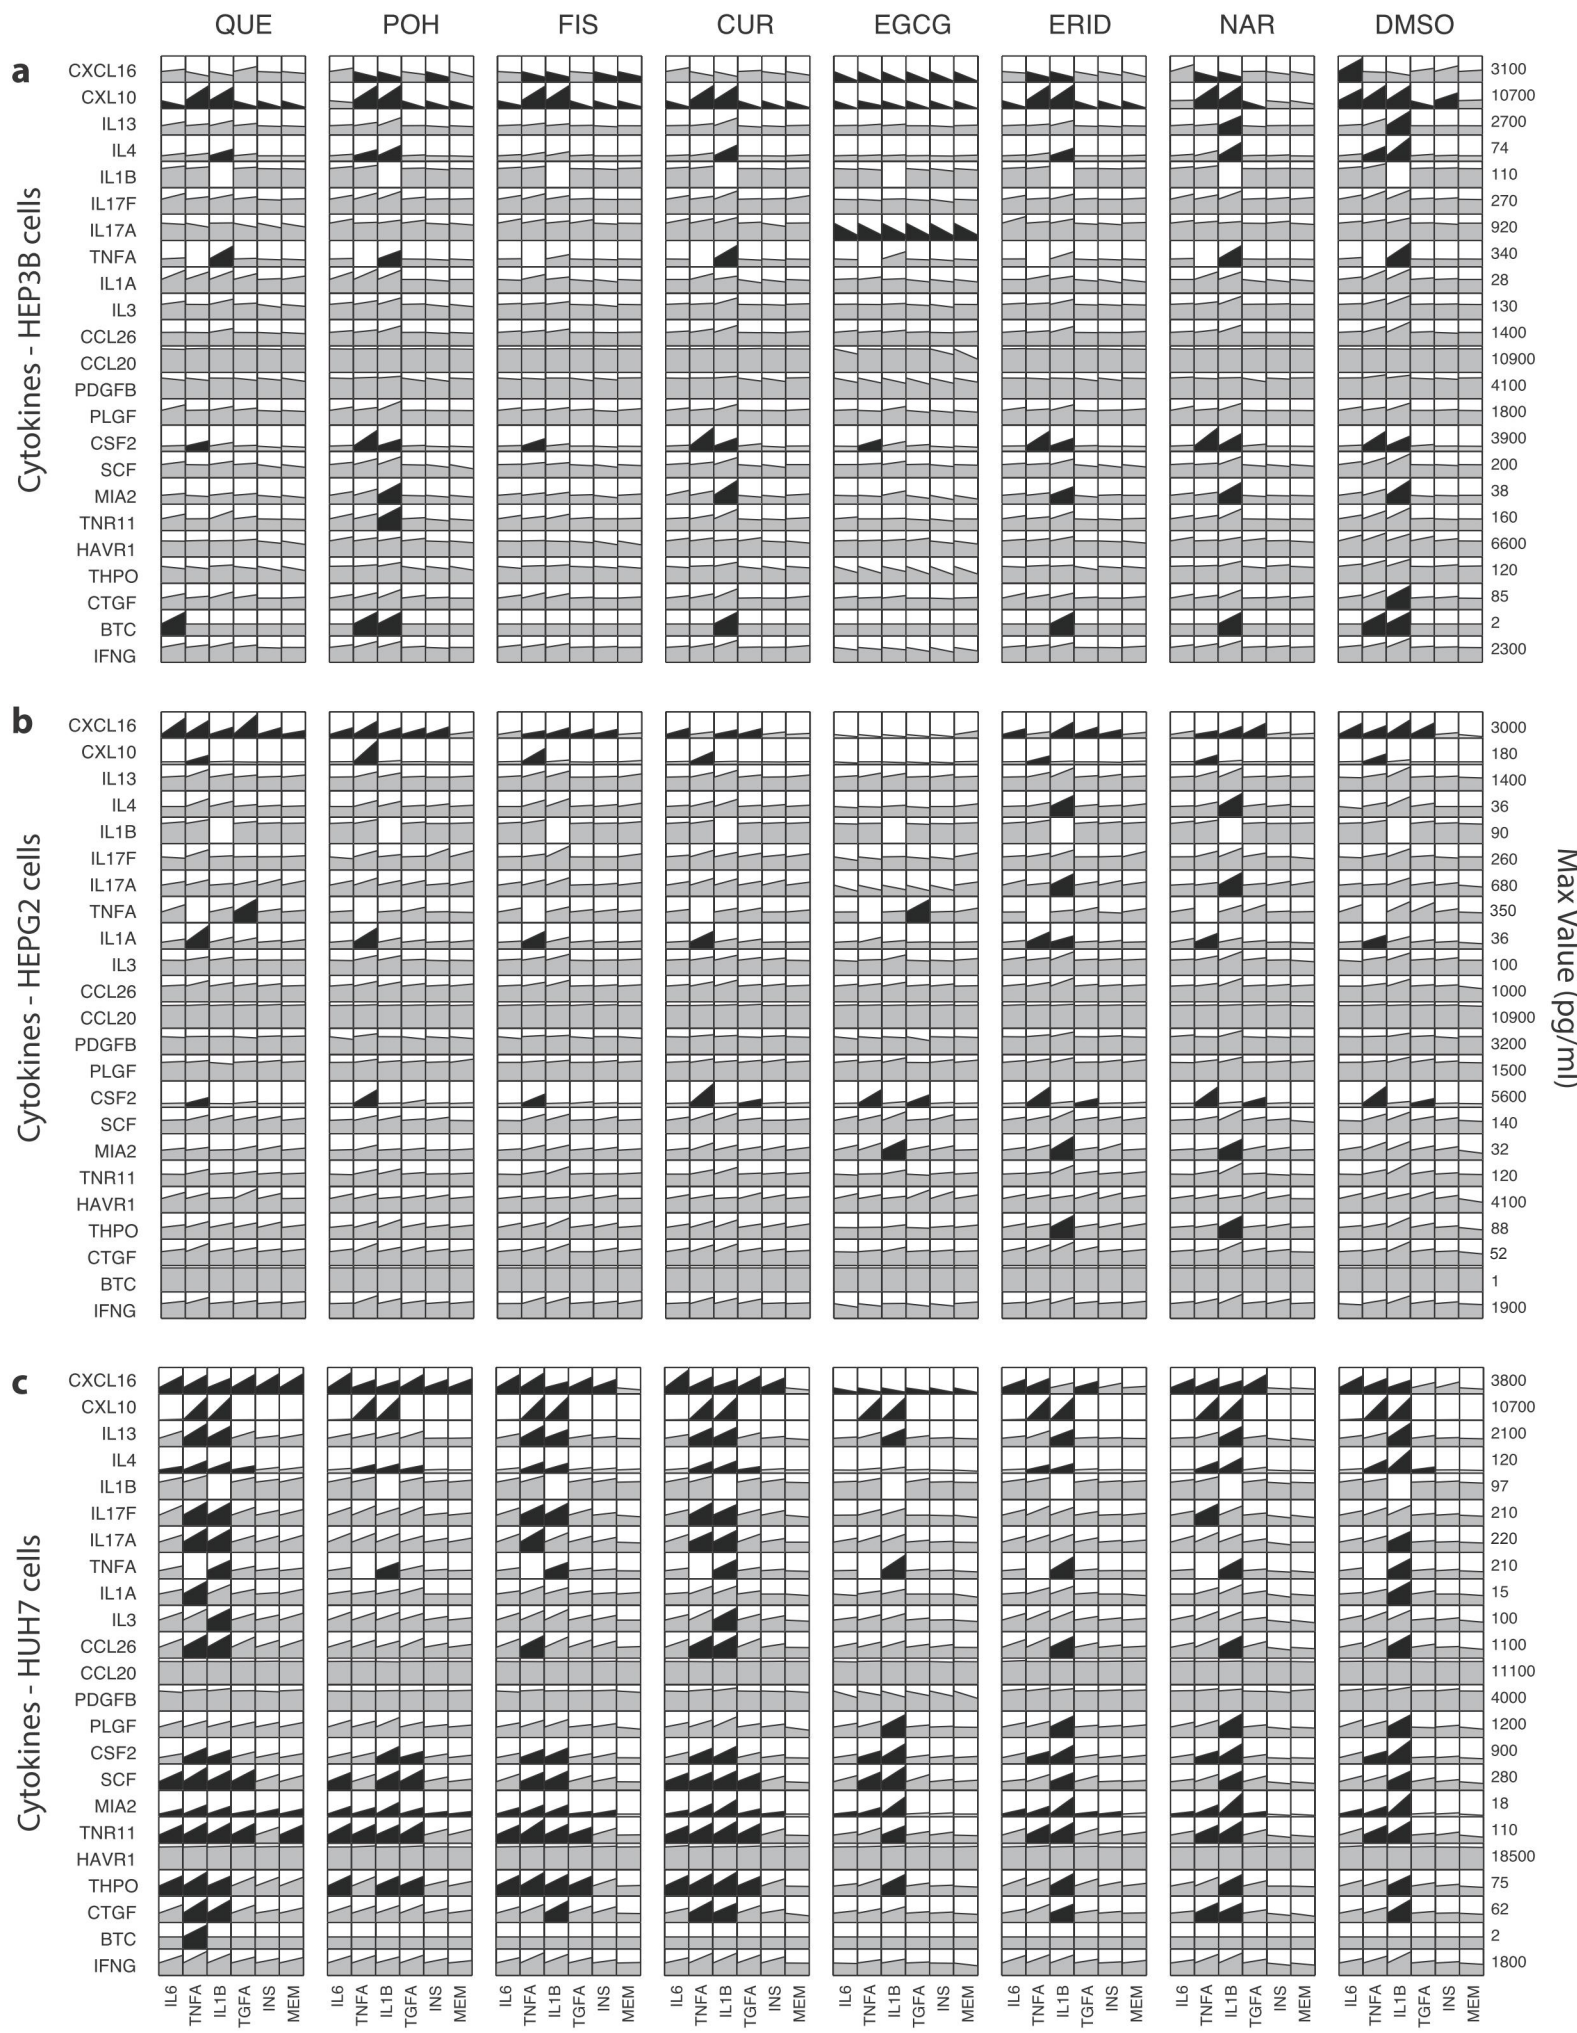

Using the 4PL non-linear regression model and the sensitivity curves presented in Supplementary Figure S4, xMAP data shown in Figure 1 and Appendix I were converted from fluorescence intensity units to actual cytokine concentration (pg/ml) and the new dataset was re-plotted. Data transformation was not possible in the case of four cytokines (CXCL7, CXCL11, IL8, GROA) because their sensitivity curves exhibited a flat profile across most concentrations thus resulting in great artefacts especially for fluorescence values close to low and high detection limits.
