# Supplementary figures and images for: Network-Based Analysis of Nutraceuticals in Human Hepatocellular Carcinomas Reveals Mechanisms of Chemopreventive Action
Source: PubMed Central journal article supplement — CPT Pharmacometrics Syst Pharmacol. 2015 Jun 1;4(6):350–61. doi: 10.1002/psp4.40 (PMC4505829; doi:10.1002/psp4.40), 2015-06-01

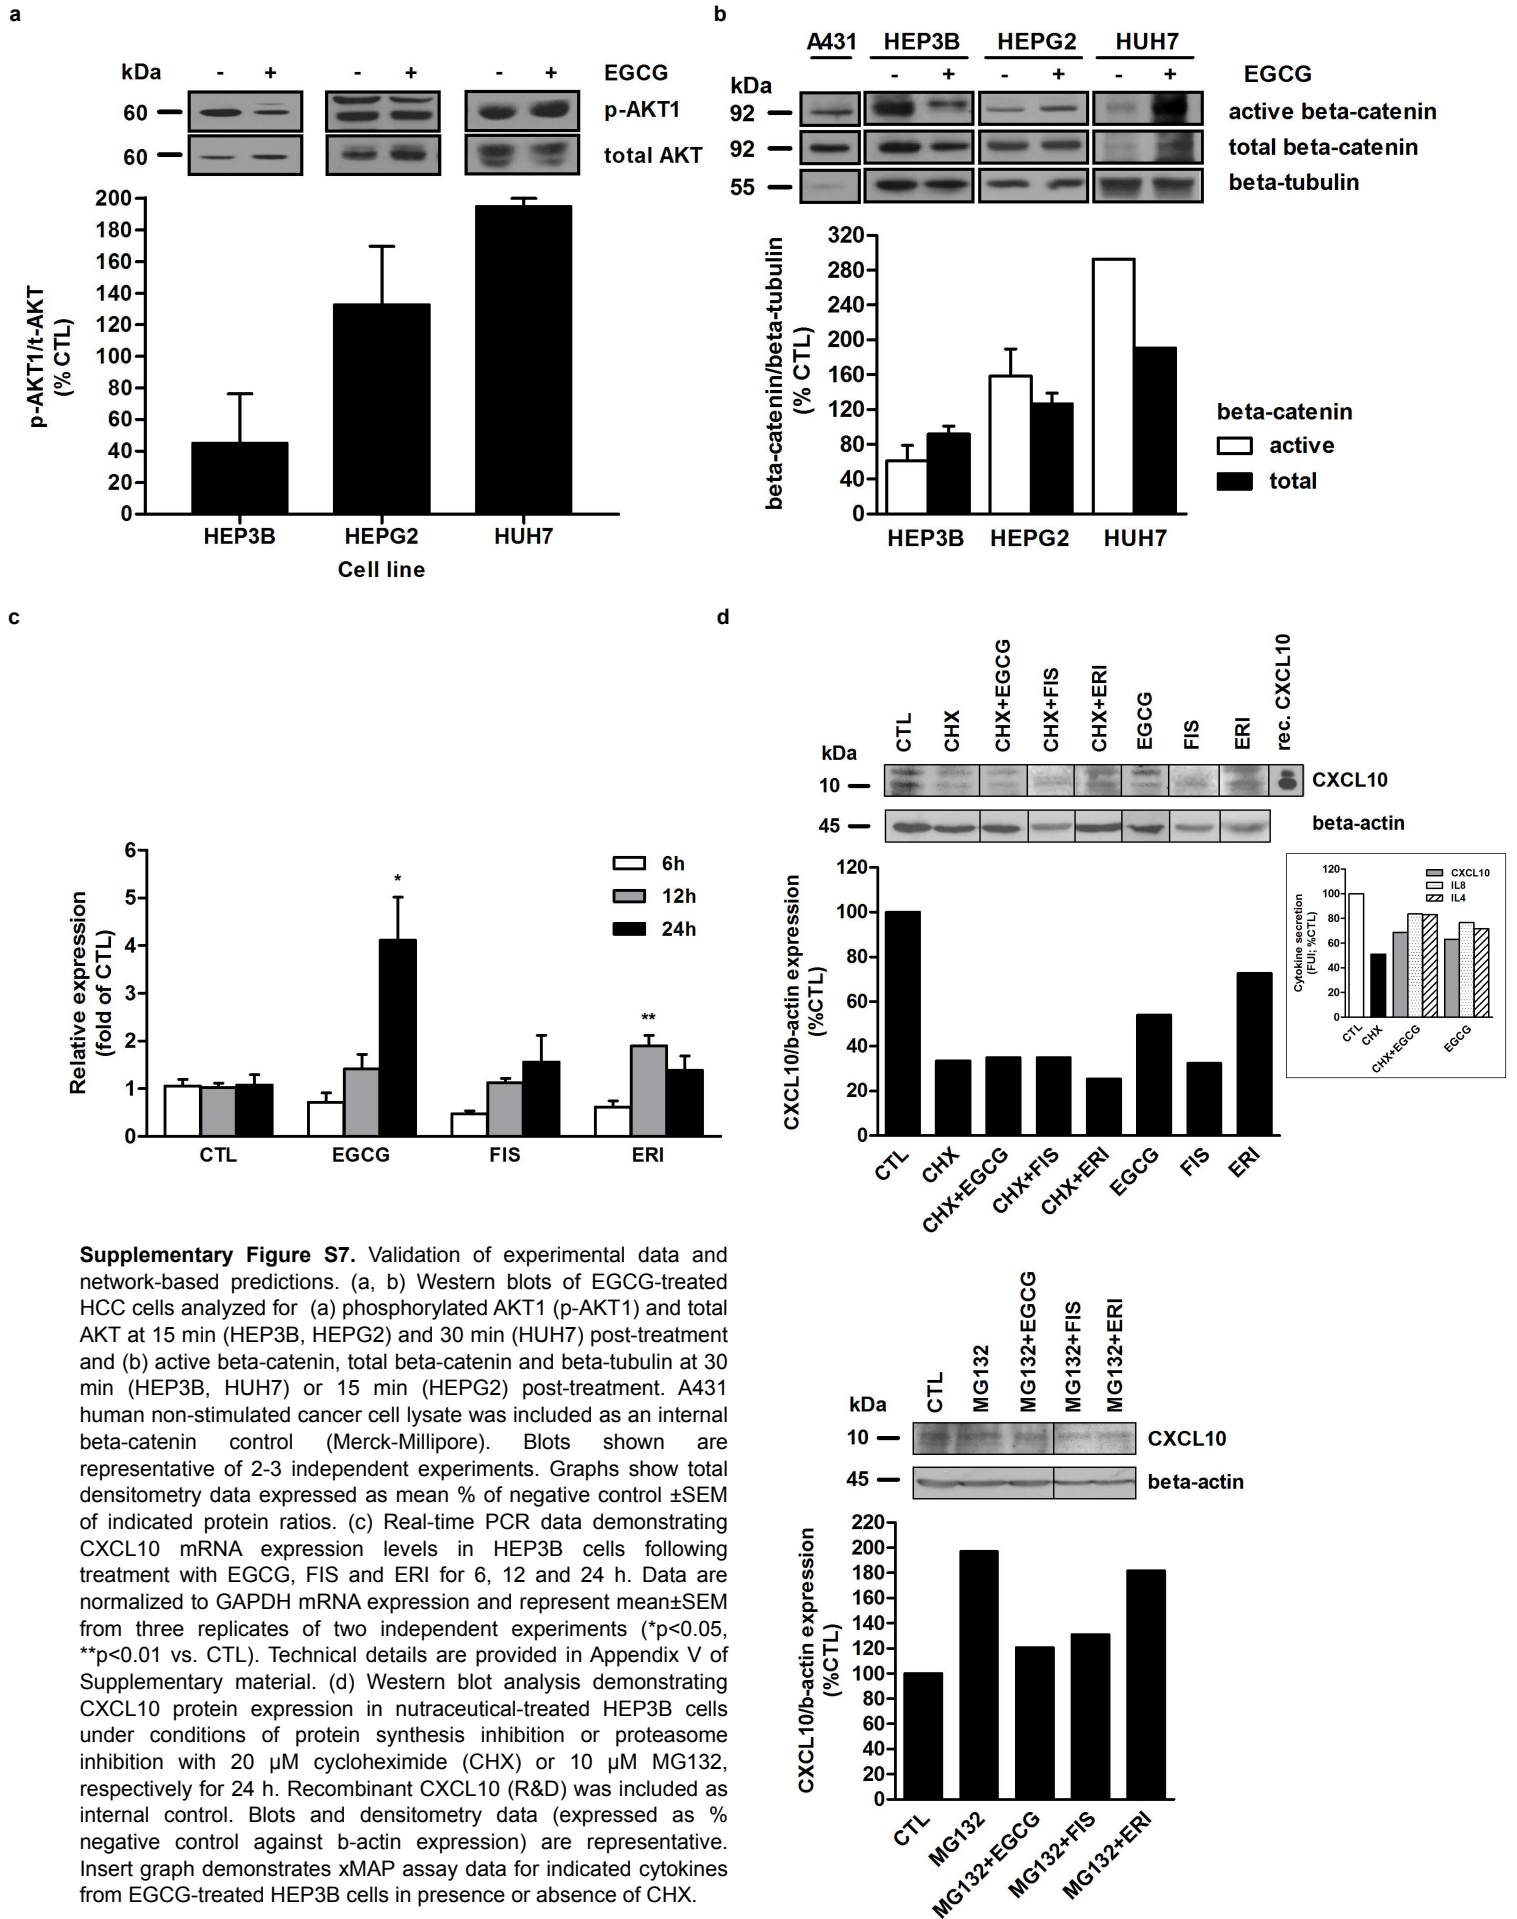

Supplement: psp40004-0350-sd13.pdf [file psp40004-0350-sd13.pdf]
